# Supplementary material for: Single-molecule, full-length transcript isoform sequencing reveals disease-associated RNA isoforms in cardiomyocytes
Source: PubMed Central journal article supplement (PMC8270901; doi:10.1038/s41467-021-24484-z), 2021-07-09
Supplement: 41467_2021_24484_MOESM9_ESM.pdf [file 41467_2021_24484_MOESM9_ESM.pdf]

**Title:** Supplementary Data 1.

**Description:** ONT sequencing runs with yield for all samples.

**Title:** Supplementary Data 2.

**Description:** All identified transcripts isoforms with exon coordinates in BED format.

**Title:** Supplementary Data 3.

**Description:** Quantification (read counts) of all transcript isoforms in all samples.

**Title:** Supplementary Data 4.

**Description:** Significantly co-associated exon pairs.

**Title:** Supplementary Data 5.

**Description:** List of differentially expressed transcript isoforms between wildtype and mutants.

**Title:** Supplementary Data 6.

**Description:** List of oligos for validating novel splice events with fragment analysis and validation status.
